# Supplementary material
Source: PubMed Central journal article supplement (PMC9380046)
Supplement: NIHMS1827715-supplement-1.pdf [file NIHMS1827715-supplement-1.pdf]

**Supplementary Table 1 | Adverse Events during Mobilization Protocol**

| Patient ID | Patient 1                    | Patient 2                   | Patient 3                    | Patient 4<br>1st<br>mobilization | Patient 4<br>2 <sup>nd</sup><br>mobilization |
|------------|------------------------------|-----------------------------|------------------------------|----------------------------------|----------------------------------------------|
| D+1        | None                         | None                        | None                         | None                             | None                                         |
| D+2        | None                         | Anemia (1)<br>Myalgia (1)   | None                         | Chill (1)                        | None                                         |
| D+3        | Bone pain (1)<br>Myalgia (1) | Anemia (2)<br>Bone pain (1) | Bone pain (1)                | Myalgia (1)                      | Bone pain (1)<br>Headache (1)                |
| D+4        | None                         | None                        | Anemia (1)<br>Bone pain (1)  | Myalgia (1)                      | Bone pain (1)                                |
| D+5        | Anemia (1)                   | Anemia (1)                  | Fatigue (1)<br>Bone pain (1) | Myalgia (1)                      | Bone pain (1)<br>Myalgia (1)                 |
| D+6        | Anemia (2)                   | Anemia (1)                  | Headache (1)<br>Anemia (2)   | Anemia (1)<br>Myalgia (1)        | Anemia (1)<br>Bone pain (1)<br>Myalgia (1)   |
| D+7        | None                         | None                        | None                         | Anemia (1)<br>Myalgia (1)        | None                                         |

D, day past G-CSF injection; grading (in parenthesis) as per the National Institute of Health Common Terminology Criteria for adverse events (CTCAE) version 4.03;

**Supplementary Table 2 | Cyto-reduction and Engraftment Data**

| <b>Patient ID</b>                                   | <b>Patient 1</b> | <b>Patient 2</b> | <b>Patient 3</b> | <b>Patient 4</b> | <b>Median</b> |
|-----------------------------------------------------|------------------|------------------|------------------|------------------|---------------|
| Cumulative Busulfan Exposure (AUC in mg* $\mu$ l/h) | 53.4             | 47.8             | 39.8             | 59.7             | 47.8          |
| Neutropenia duration (d)                            | 5                | 6                | 11               | 10               | 8             |
| Neutrophil engraftment (d)                          | 16               | 18               | 24               | 20               | 19            |
| Platelet engraftment (d)                            | 20               | 19               | 25               | 14               | 20            |
| Discharge post HSCT (d)                             | 20               | 23               | 25               | 21               | 22            |
| Follow-up (months)                                  | 96               | 94               | 75               | 60               | 84            |

AUC, area under the curve; Neutropenia, absolute neutrophil count (ANC) <500/ $\mu$ L; Neutrophil engraftment, ANC exceeding 500/ $\mu$ L for 3 consecutive days. The first of these 3 consecutive days was considered the day of engraftment; Platelet engraftment, a platelet count exceeding 20,000/ $\mu$ L without transfusion support for 7 consecutive days. The first of these 7 consecutive days was considered the day of engraftment; d, day; HSCT, Hematopoietic stem-cell transplantation; Follow up to last qPCR data.

**Supplementary Table 3 | Non-hematologic Toxicity of Busulfan**

| <b>Patient ID</b>   | <b>Patient 1</b> | <b>Patient 2</b> | <b>Patient 3</b> | <b>Patient 4</b> |
|---------------------|------------------|------------------|------------------|------------------|
| Oral mucositis      | 1                | 2                | 2                | 2                |
| GI (Abdominal pain) | 2                | 1                | 0                | 0                |
| Hyperbilirubinemia  | 3                | 2                | 0                | 0                |
| Febrile neutropenia | 3                | 3                | 3                | 0                |
| GU (Metrorrhagia)   | 1                | 2                | NA               | NA               |
| Headache            | 0                | 0                | 0                | 1                |
| VOD                 | 0                | 0                | 0                | 0                |

Grading as per the National Institute of Health Common Terminology Criteria for adverse events (CTCAE) version 4.03

**Supplementary Table 4 | Cancer-related Genes**

| <b>Gene symbol</b> | <b>Chromosomal location</b> | <b>Molecular function</b>                               | <b>Biological process</b>                                                                            | <b>Cancer association</b>                                                                             | <b>Leukemia/ lymphoma association</b>                          | <b>Selected References</b> |
|--------------------|-----------------------------|---------------------------------------------------------|------------------------------------------------------------------------------------------------------|-------------------------------------------------------------------------------------------------------|----------------------------------------------------------------|----------------------------|
| SETD2              | 3p21.31                     | Histone lysine methyltransferase.                       | transcriptional regulator                                                                            | Clear cell renal cell cancer, lung cancer, acute lymphoblastic leukemia, glioma                       | ALL, AML (frequent), (MLL)                                     | 1-3                        |
| CUX1               | 7q22.1                      | Homeodomain family DNA binding protein.                 | transcriptional activator/repressor                                                                  | Colon cancer, pancreatic cancer, breast cancer, glioblastoma                                          | MDS and myeloid neoplasms                                      | 4-6                        |
| PXN-AS1, PXN       | PXN-AS1/PXN: 12q24.23       | PXN-AS1: non-protein coding; PXN: Cytoskeletal protein. | PXN-AS1: long non-coding RNA; PXN: involved in focal cell adhesion                                   | PXN-AS1: multiple malignancies, such as pancreatic cancer, glioblastoma; PXN: Promotes tumor invasion | CML: phosphorylation of paxillin by BCR/ABL                    | 7,8                        |
| SLX4               | 16p13.3                     | Endonuclease.                                           | involved in DNA repair                                                                               | Breast cancer                                                                                         | Hematopoietic dysfunction, aplastic anemia, childhood leukemia | 9-12                       |
| NF1                | 17q11.2                     | GTPase-activating protein neurofibromin.                | Negative regulator of the Ras signal transduction pathway                                            | Hamartoneoplastic syndrome Neurofibromatosis NF1 (benign and malignant tumors)                        | NF1 associated with JMML (juvenile myelomonocytic leukemia).   | 13,14                      |
| NFIC               | 19p13.3                     | DNA-binding protein.                                    | transcription factor                                                                                 | Potential oncogene or tumour suppressor across various cancer models                                  | NFIC reported to be upregulated in AML                         | 15,16                      |
| CCDC97             | 19q13.2                     | Protein. Function unclear.                              | unclear                                                                                              | Multiple malignancies                                                                                 | Not described                                                  |                            |
| POU2F2             | 19q13.2                     | Homeobox-containing DNA-binding protein.                | transcription factor, activating immunoglobulin gene expression in B-cells                           | Papillomas, gastric cancer                                                                            | B- and T-cell lymphoma, follicular lymphoma                    | 17,18                      |
| PCM1               | 8p22                        | centriolar satellite component protein.                 | essential for localization of centrosomal proteins, and for anchoring microtubules to the centrosome | Papillary thyroid carcinomas, hematological malignancies                                              | Acute and chronic leukemia, CML, T-cell lymphoma               | 19,20                      |

|         |         |                                                    |                                                                                                          |                                                                          |                                                   |       |
|---------|---------|----------------------------------------------------|----------------------------------------------------------------------------------------------------------|--------------------------------------------------------------------------|---------------------------------------------------|-------|
| PLEKHB1 | 11q13.4 | Protein. Function unclear.                         | unclear                                                                                                  | Multiple malignancies                                                    | Not described                                     |       |
| CBFB    | 16q22.1 | regulatory subunit protein, non-DNA binding.       | Subunit of a heterodimeric core-binding transcription factor (CBF). Forms CBF with RUNX family proteins. | Hematological malignancies, breast cancer, intestinal cancer             | Frequent in acute leukemias, CBF-AML              | 21    |
| MSL1    | 17q21.1 | MSL1 protein involved in histone H4 acetylation.   | Gene activation.                                                                                         | Ovarian cancer                                                           | Not described                                     | 22    |
| MAP4    | 3p21.31 | Major non-neuronal microtubule-associated protein. | promotes microtubule assembly.                                                                           | Ovarian Clear Cell Adenocarcinoma                                        | Diffuse large B-cell lymphoma (MALT1-MAP4 fusion) | 23,24 |
| NFAT5   | 16q22.1 | DNA binding protein, homodimer.                    | Transcription factor.                                                                                    | Multiple malignancies                                                    | Not described                                     |       |
| PIEZO1  | 16q24.3 | Transmembrane protein.                             | Component of a mechanically activated ion channel.                                                       | Multiple malignancies, such as breast, gastric, bladder, prostate cancer | Not described                                     | 25,26 |
| ST13    | 22q13.2 | Adaptor protein.                                   | Mediates the association of heat shock proteins, candidate tumor suppressor gene                         | Multiple malignancies, such as colon, prostate, pancreatic cancer        | B-Cell leukemia and multiple myeloma              | 27    |
| SLC45A3 | 1q32.1  | Solute carrier family protein.                     | Coordinates response to hyperosmolarity                                                                  | Prostate cancer                                                          | Not described                                     | 28,29 |
| NFATC3  | 16q22.1 | DNA-binding protein.                               | Regulator of transcriptional activation, oncogenic and tumor-suppressive activities                      | Multiple malignancies, such as glioma                                    | Lymphoma                                          | 30,31 |

|                                         |         |                                           |                                                                                                    |                                                       |                              |       |
|-----------------------------------------|---------|-------------------------------------------|----------------------------------------------------------------------------------------------------|-------------------------------------------------------|------------------------------|-------|
| SPPL2B                                  | 19p13.3 | Transmembrane protein. Aspartic protease. | Cleaves transmembrane domain of TNF-alpha.                                                         | Breast cancer (metastasis)                            | Not described                | 32    |
| GNA15                                   | 19p13.3 | G protein subunit.                        | Involved in various transmembrane signaling systems.                                               | Small intestine neuroendocrine neoplasia              | Not described                | 33    |
| IKZF2                                   | 2q34    | Zinc-finger protein.                      | Hematopoietic-specific transcription factors involved in the regulation of lymphocyte development. | Lymphoid malignancies                                 | B- and T-cell leukemias, AML | 34,35 |
| COL4A3 BP (HGNC approved symbol: CERT1) | 5q13.3  | Kinase 'Goodpasture antigen'.             | Phosphorylates type IV collagen                                                                    | Multiple malignancies, such as breast and lung cancer | Not described                | 36    |
| RABL6                                   | 9q34.3  | Small GTPase.                             | Member of the Ras oncogene family                                                                  | Breast cancer, osteosarkoma, neuroendocrine tumors    | Not described                | 37-39 |
| KDM6A                                   | Xp11.3  | Histone demethylase                       | Regulates lineage choice in development, tumor suppressor.                                         | Multiple malignancies                                 | T-ALL, AML                   | 40-43 |
| UBR2                                    | 6p21.1  | E3 ubiquitin ligase UBR2                  | Regulator in caspase-independent cell death, participate in the N-end rule proteolytic pathway     | Multiple malignancies                                 | Lymphoma                     | 44-49 |

25 integration sites (relative abundance >1%) found within 50 kb of cancer-related genes. Chromosomal location, molecular function and biological process according to databases NCBI (<http://www.ncbi.nlm.nih.gov/gene>) and GeneCards (<http://www.genecards.org>).

**Supplementary Table 5 | Summary of Busulfan Exposure and Toxicity in Gene Addition and Gene Editing Trials in  $\beta$  -thalassemia**

| Trial                                               | Phase | Start         | Cumulative Busulfan AUC                                      | Number of Patients | Cases of VOD | Neutrophil Engraftment      | Platelet Engraftment      | Hospitalization        | References       |
|-----------------------------------------------------|-------|---------------|--------------------------------------------------------------|--------------------|--------------|-----------------------------|---------------------------|------------------------|------------------|
| LGG01                                               | 1/2   | 2006          | NA<br>(daily target AUC:<br>4300 $\mu\text{M}^*\text{min}$ ) | 3                  | NA           | NA                          | NA                        | NA                     | <sup>50</sup>    |
| NCT01639690<br>(MSKCC)                              | 1     | 2012          | 39.8-59.7 mg*h/l<br>(median: 50.6)                           | 4                  | 0            | 16-24d<br>(median: 19)      | 14-25d<br>(median: 19.5)  | 20-25d<br>(median: 22) | This manuscript  |
| NCT01745120<br>(HGB-204)                            | 1/2   | 2013          | 49.7-77.5 mg*h/l<br>(median: NA)                             | 18                 | 2            | 14-30d<br>(median:<br>18.5) | 19-191d<br>(median: 39.5) | NA                     | <sup>51</sup>    |
| NCT02151526<br>(HGB-205)                            | 1/2   | 2013          | 76.7-85.6 mg*h/l<br>(median: NA)                             | 4                  | 0            | 14-29d<br>(median:<br>16.5) | 20-26d<br>(median: 23)    | NA                     | <sup>51</sup>    |
| NCT02906202*/<br>NCT03207009*<br>(HGB-207/ HGB-212) | 3     | 2016/<br>2017 | 60.9-149.2 mg*h/l<br>(median: 73.1)                          | 31                 | 3            | 13-38d<br>(median: 25)      | 20-84d<br>(median: 44)    | 30-92d<br>(median: NA) | <sup>52</sup>    |
| NCT03655678*<br>(CLIMB THAL-111)                    | 1/2   | 2018          | 73.9-90.3 mg*h/l<br>(median: 82.1)                           | 7                  | 2            | 20-39d<br>(median: 32)      | 29-52d<br>(median: 37)    | NA                     | <sup>53,54</sup> |

HSC, hematopoietic stem cell; AUC, area under the curve; cumulative busulfan exposure; cumulative busulfan exposure was calculated by the sum of the daily average busulfan AUCs published; NA, not applicable; mPBC, mobilized peripheral blood cells; \* interim results.

**Supplementary Table 6 | Summary of Top Integration Sites in Whole Blood in Gene-Addition Trials in  $\beta$ -thalassemia**

| Trial      | MSK trial       |               |                |                 | HGB-204/HGB-205 trials |              |                |               | Globe trial    |               |
|------------|-----------------|---------------|----------------|-----------------|------------------------|--------------|----------------|---------------|----------------|---------------|
| Patient ID | Patient 1       | Patient 2     | Patient 3      | Patient 4       | Patient 1102           | Patient 1103 | Patient 1201   | Patient 1202  | Patient 1      | Patient 4     |
| Timepoint  | Y7              | Y6            | Y6             | Y4.5            | Y2                     | Y2           | Y2             | Y2            | Y2             | Y1.5          |
| Top1       | SLC25A33        | MSRB3         | SSH2           | <b>UBR2</b>     | SART3                  | <b>NBR1</b>  | CAPN1          | POLA2         | AHNAK          | <b>RNF216</b> |
| Top2       | PRKCB           | <b>SLX4</b>   | <b>MAP4</b>    | <b>COL4A3BP</b> | TTYH1                  | <b>AKT2</b>  | AARSD1         | DNAH1         | MOB3A          | ARFGEF1       |
| Top3       | <b>SETD2</b>    | FLRT2         | C6orf106       | EGFEM1P         | HN1L                   | LINC00470    | <b>SLC27A1</b> | FCHSD2        | XKR3           | FAM208B       |
| Top4       | STRBP           | <b>CCDC97</b> | SNX37          | <b>KDM6A</b>    | SUPT3H                 | PIK3CG       | APPBP2         | TMEM66        | CCDC88A        | PTPRA         |
| Top5       | <b>CUX1</b>     | ADAM22        | <b>CBFB</b>    | GOLPH3L         | PHF16                  | <b>MLLT3</b> | ILF3           | <b>CBFB</b>   | GPATCH8        | DNAJC8        |
| Top6       | <b>NF1</b>      | ZFAND6        | C6orf106       | SLC22A11        | OR1A1                  | CASC5        | NT5C2          | <b>HMGA2</b>  | MUM1           | EIF4G3        |
| Top7       | POC1A           | <b>NFIC</b>   | <b>PLEKHB1</b> | <b>GNA15</b>    | SGK493                 | <b>EHMT1</b> | MGA            | <b>AKAP13</b> | <b>PDE4DIP</b> | MROH1         |
| Top8       | TFCP2           | <b>NF1</b>    | LOC101927237   | USP48           | MARK2                  | <b>NSD1</b>  | <b>BAX</b>     | C11orf49      | ISY1           | STXBP3        |
| Top9       | GJC1            | <b>PCM1</b>   | NDUFS4         | MIA2            | RAVER2                 | CYTH1        | DOLPP1         | POLA2         | BBX            | CEL           |
| Top10      | <b>STIL</b>     | MGA           | SLC22A11       | POLQ            | EYA3                   | BLVRB        | UBA3           | TMEM55A       | CAPN1          | LOC101927817  |
| Reference  | This manuscript |               |                |                 | 51                     |              |                |               | 55             |               |

Cancer related genes highlighted in bold; Y, year.



### Supplementary Table 7 | Primary and Secondary Objectives

#### Primary objective: Evaluation of safety

Occurrence of insertional oncogenesis

Generation of a replication-competent lentivirus (RCL)

Safety of a low dose non-myeloablative conditioning regimen

#### Secondary objective: evaluation of efficacy

Level of engraftment of transduced CD34+ cells

Biological activity of the globin vector, as measured by:

- presence and expression of the transduced  $\beta$ -globin transgene in peripheral blood cells; and in hematopoietic progenitor cells in bone marrow
- The frequency of palliative transfusions subsequent to transplantation.

### Supplementary Table 8 | HbF and HPFH

| Patient ID                | Patient 1                                                           | Patient 2                                                           | Patient 3                                                                                         | Patient 4                                                         |
|---------------------------|---------------------------------------------------------------------|---------------------------------------------------------------------|---------------------------------------------------------------------------------------------------|-------------------------------------------------------------------|
| HbF (%) pre conditioning  | 1.2%                                                                | Not measurable                                                      | 13.1%                                                                                             | 4.6%                                                              |
| HbF (%) max post infusion | 3.2% (7 months)                                                     | 15.5% (4 months)                                                    | 21.8% (14 months)                                                                                 | 12.7% (3months)                                                   |
| HbF (%) Last follow-up    | 0.4%                                                                | 1.1%                                                                | 11.2%                                                                                             | 2.6%                                                              |
| HPFH polymorphisms        | - AGCA at Positions -222 to -225, <sup>A</sup> gamma (heterozygous) | - AGCA at Positions -222 to -225, <sup>A</sup> gamma (heterozygous) | <i>BCL11A</i> (rs11886868 T/C, rs1427407 G/T, rs10189857 A/G)<br><i>HBS1L-MYB</i> (rs9399137 C/T) | - AGCA at Positions -222 to -225, <sup>A</sup> gamma (homozygous) |

HPFH, Hereditary persistence of fetal hemoglobin; - AGCA, Deletion of four nucleotides, AGCA, at positions -225 to -222, this deletion is reported as a polymorphism that determines a very slight increase in HbF 1-3%. *BCL11A* and *HBS1L-MYB*, non-deletional polymorphisms in *BCL11A* (chromosome 2p16) and intergenic region *HBS1L-MYB* (chromosome 6q23).

**Supplementary Table 9 a | Patient 1**  
**Transfusion requirements over time**

| Months pre/post infusion | Transfusion volume (ml/kg/year) | Hb pre transfusion (g/dl) | Mean daily decrease in Hb (%) |
|--------------------------|---------------------------------|---------------------------|-------------------------------|
| -60                      | 191.56                          | 9.21                      | 1,13                          |
| -48                      | 203.17                          | 9.33                      | 1,16                          |
| -36                      | 214.53                          | 9.38                      | 1,22                          |
| -24                      | 213.44                          | 9.33                      | 1,22                          |
| -12                      | 192.31                          | 9.14                      | 1,22                          |
| 0                        | 230.88                          | 9.32                      | 1,46                          |
| 12                       | 160.5                           | 8.19                      | 1,42                          |
| 24                       | 197.14                          | 8.91                      | 1,39                          |
| 36                       | 148.22                          | 9.11                      | 1,38                          |
| 48                       | 231.51                          | 9.,35                     | 1,48                          |
| 60                       | 204.44                          | 9.72                      | 1,09                          |
| 72                       | 219                             | 9.5                       | 1,16                          |
| 84                       | 209.43                          | 8.8                       | 1.11                          |
| 96                       | 181.74                          | 9.33                      | 1.19                          |

**Supplementary Table 9 b | Patient 2**  
**Transfusion requirements over time**

| Months pre/post infusion | Transfusion volume (ml/kg/year) | Hb pre transfusion (g/dl) | Mean daily decrease in Hb (%) |
|--------------------------|---------------------------------|---------------------------|-------------------------------|
| -60                      | 221.54                          | 9.68                      | 1.29                          |
| -48                      | 225.16                          | 9.64                      | 1.25                          |
| -36                      | 201.27                          | 9.16                      | 1.18                          |
| -24                      | 221.22                          | 9.52                      | 1.08                          |
| -12                      | 198.35                          | 9.4                       | 1.17                          |
| 0                        | 246.58                          | 9.76                      | 1.22                          |
| 12                       | 107.64                          | 8.23                      | 1.4                           |
| 24                       | 41.49                           | 7.63                      | 1.34                          |
| 36                       | 38.14                           | 7.62                      | 1.29                          |
| 48                       | 91.73                           | 8.27                      | 0.68                          |
| 60                       | 131.2                           | 9.24                      | 0.74                          |
| 72                       | 123.34                          | 9.25                      | 0.63                          |
| 84                       | 110.09                          | 8.87                      | 0.74                          |
| 96                       | 101.35                          | 9.09                      | 0.62                          |

**Supplementary Table 9 c | Patient 3**  
**Transfusion requirements over time**

| Months pre/post infusion | Transfusion volume (ml/kg/year) | Hb pre transfusion (g/dl) | Mean daily decrease in Hb (%) |
|--------------------------|---------------------------------|---------------------------|-------------------------------|
| -60                      | 177.8                           | 10.1                      | 1.2                           |
| -48                      | 176.4                           | 10.3                      | 1.1                           |
| -36                      | 175.2                           | 10.3                      | 1.2                           |
| -24                      | 182.8                           | 10.3                      | 1.1                           |
| -12                      | 171                             | 10.2                      | 1.1                           |
| 0                        | 191.2                           | 10.2                      | 1.2                           |
| 12                       | 171.9                           | 9.3                       | 1.1                           |
| 24                       | 166.2                           | 9.9                       | 0.9                           |
| 36                       | 170.9                           | 9.6                       | 0.9                           |
| 48                       | 175                             | 9.6                       | 0.8                           |
| 60                       | 198.4                           | 10                        | 0.9                           |
| 72                       | 212                             | 10                        | 0.9                           |
| 84                       | 169                             | 10.4                      | 0.7                           |

**Supplementary Table 9 d | Patient 4**  
**Transfusion requirements over time**

| Months pre/post infusion | Transfusion volume (ml/kg/year) | Hb pre transfusion (g/dl) | Mean daily decrease in Hb (%) |
|--------------------------|---------------------------------|---------------------------|-------------------------------|
| -36                      | 265.68                          | 9.13                      | 1.59                          |
| -24                      | 267.93                          | 9.17                      | 1.61                          |
| -12                      | 268.68                          | 9.3                       | 1.62                          |
| 0                        | 274.19                          | 9.34                      | 1.63                          |
| 12                       | 145.36                          | 8.52                      | 1.62                          |
| 24                       | 183.68                          | 8.73                      | 1.07                          |
| 36                       | 184.92                          | 9.16                      | 1.15                          |
| 48                       | 185.52                          | 9.21                      | 0.97                          |
| 60                       | 183.14                          | 8.9                       | 1.25                          |
| 72                       | 156.57                          | 8.14                      | 1.15                          |

**Supplementary Table 10 | Integration Site Samples Metadata**

| GTSP     | Time point | Pt | Cell Type | Total Reads | Inferred Cells | Unique Sites | Gini  | Chao1   | Shannon | Pielou | UC50  |
|----------|------------|----|-----------|-------------|----------------|--------------|-------|---------|---------|--------|-------|
| GTSP4268 | D0         | 1  | CD34+     | 39,687      | 1,452          | 1,443        | 0.006 | 104,189 | 7.27    | 1      | 718   |
| GTSP1699 | M54        | 1  | WB        | 390,529     | 1,392          | 838          | 0.333 | 2,280   | 6.45    | 0.959  | 190   |
| GTSP1393 | Y3         | 1  | WB        | 918,125     | 1,606          | 1,019        | 0.304 | 3,141   | 6.7     | 0.967  | 244   |
| GTSP2180 | Y5         | 1  | WB        | 802,067     | 2,395          | 1,363        | 0.358 | 3,539   | 6.9     | 0.956  | 289   |
| GTSP3310 | Y6         | 1  | WB        | 423,243     | 5,911          | 1,968        | 0.532 | 3,467   | 6.95    | 0.917  | 234   |
| GTSP3437 | Y7         | 1  | WB        | 546,205     | 925            | 509          | 0.358 | 1,094   | 5.95    | 0.955  | 112   |
| GTSP1395 | M42        | 2  | WB        | 824,102     | 1,876          | 1,095        | 0.362 | 3,135   | 6.6     | 0.944  | 224   |
| GTSP3622 | M53        | 2  | WB        | 417,569     | 1,321          | 708          | 0.388 | 1,733   | 6.17    | 0.94   | 136   |
| GTSP1701 | Y4         | 2  | WB        | 322,345     | 2,896          | 1,220        | 0.48  | 2,395   | 6.49    | 0.914  | 167   |
| GTSP2181 | Y5         | 2  | WB        | 794,730     | 7,402          | 2,078        | 0.59  | 3,812   | 6.78    | 0.887  | 187   |
| GTSP3311 | Y6         | 2  | WB        | 389,410     | 7,131          | 1,905        | 0.601 | 3,396   | 6.66    | 0.882  | 166   |
| GTSP4269 | D0         | 3  | CD34+     | 21,320      | 1,783          | 1,660        | 0.064 | 11,522  | 7.39    | 0.997  | 769   |
| GTSP1599 | M42        | 3  | WB        | 370,340     | 689            | 557          | 0.166 | 2,130   | 6.23    | 0.986  | 213   |
| GTSP3626 | M75        | 3  | WB        | 1,001,616   | 744            | 508          | 0.284 | 2,666   | 5.96    | 0.957  | 137   |
| GTSP3309 | Y5         | 3  | WB        | 275,417     | 260            | 198          | 0.221 | 2,765   | 5.08    | 0.96   | 69    |
| GTSP3438 | Y6         | 3  | WB        | 524,064     | 847            | 516          | 0.317 | 1,246   | 5.98    | 0.957  | 126   |
| GTSP0886 | D0         | 4  | CD34+     | 325,929     | 941            | 852          | 0.088 | 5,807   | 6.71    | 0.994  | 382   |
| GTSP0890 | D0         | 4  | CD34+     | 512,004     | 9,934          | 9,626        | 0.03  | 171,156 | 9.16    | 0.999  | 4,660 |
| GTSP4270 | D0         | 4  | CD34+     | 13,208      | 616            | 616          | 0     | 190,036 | 6.42    | 1      | 309   |
| GTSP4185 | M70        | 4  | WB        | 942,615     | 119            | 71           | 0.373 | 681     | 3.78    | 0.886  | 12    |
| GTSP3306 | Y3         | 4  | WB        | 468,354     | 4,021          | 743          | 0.712 | 1,175   | 5.16    | 0.78   | 23    |
| GTSP3308 | Y4         | t4 | WB        | 460,687     | 3,600          | 699          | 0.73  | 1,364   | 4.93    | 0.753  | 16    |
| GTSP3440 | Y4.5       | t4 | WB        | 358,613     | 779            | 238          | 0.598 | 459     | 4.51    | 0.824  | 17    |

GTSP, internal tracking number; Pt, patient; WB, whole blood; Total Reads, total number of sequence reads; Inferred Cells, inferred number of cells queried from SonicAbundance; Unique Sites, the number of integration sites recovered after dereplication; Chao1, minimum population size inferred from sharing among replicates; Gini, the asymmetry of clonal distribution; Shannon, the diversity summarized as the Shannon index; UC50, and the number of unique clones making up the top 50% of the sample abundance.

**Supplementary Table 11 | Clusters of integration sites in pooled patient samples pre- and post-infusion**

| <b>Chr.</b> | <b>Start</b> | <b>End</b> | <b>Width</b> | <b>Sites:<br/>6 years</b> | <b>Sites:<br/>Pre-infusion</b> | <b>Cluster<br/>Source</b> | <b>Nearby genes of<br/>interest</b> |
|-------------|--------------|------------|--------------|---------------------------|--------------------------------|---------------------------|-------------------------------------|
| chr1        | 28994617     | 29066014   | 71398        | 6                         | 0                              | T6                        | EPB41                               |
| chr1        | 155475830    | 155523663  | 47834        | 8                         | 1                              | T6                        | ASH1L                               |
| chr2        | 42641725     | 43533854   | 892130       | 15                        | 2                              | T6                        |                                     |
| chr3        | 47678397     | 48030376   | 351980       | 17                        | 9                              | T6                        |                                     |
| chr3        | 51600444     | 52257778   | 657335       | 8                         | 1                              | T6                        |                                     |
| chr8        | 144227307    | 145061045  | 833739       | 0                         | 57                             | T0                        |                                     |
| chr9        | 137284409    | 137364400  | 79992        | 6                         | 0                              | T6                        | EXD3, NRARP                         |
| chr11       | 65903017     | 66101385   | 198369       | 0                         | 36                             | T0                        |                                     |
| chr12       | 8702107      | 9689590    | 987484       | 15                        | 10                             | T6                        |                                     |
| chr12       | 50561540     | 50888906   | 327367       | 13                        | 7                              | T6                        |                                     |
| chr15       | 41688228     | 41956383   | 268156       | 14                        | 8                              | T6                        |                                     |
| chr16       | 581878       | 1534701    | 952824       | 3                         | 65                             | T0                        |                                     |
| chr16       | 15259791     | 16053684   | 793894       | 16                        | 2                              | T6                        |                                     |
| chr16       | 28163642     | 28452684   | 289043       | 9                         | 0                              | T6                        |                                     |
| chr17       | 42360682     | 42374061   | 13380        | 6                         | 0                              | T6                        | STAT3                               |
| chr17       | 81593009     | 81881897   | 288889       | 1                         | 39                             | T0                        |                                     |
| chr19       | 2260306      | 3127896    | 867591       | 21                        | 13                             | T6                        |                                     |
| chr19       | 10102708     | 10223830   | 121123       | 0                         | 31                             | T0                        | DNMT1                               |
| chr19       | 11998654     | 12656008   | 657355       | 16                        | 12                             | T6                        |                                     |

Chr., chromosome; Sites, number of integration sites at 6 years follow-up or pre-infusion; Cluster Source, T0 indicates pretransplant, T6 is after ~6 years.

**Supplementary Table 12 | Gene Ontology Analysis of Integration Site Distributions in pooled patient samples pre- and six years post infusion**

| Function                                 | GO         | p.value    | T0 GO      | T0 no GO   | T6 GO      | T6 no GO   | Corr p.value |
|------------------------------------------|------------|------------|------------|------------|------------|------------|--------------|
| mitochondrion                            | GO:0005739 | 0.00638647 | 0.0674229  | 0.9325771  | 0.05591736 | 0.94408264 | 0.11883687   |
| extracellular exosome                    | GO:0070062 | 0.0069904  | 0.1010989  | 0.8989011  | 0.1154278  | 0.8845722  | 0.11883687   |
| protein serine/threonine kinase activity | GO:0004674 | 0.02398025 | 0.0358738  | 0.9641262  | 0.04334157 | 0.95665843 | 0.20647289   |
| endosome                                 | GO:0005768 | 0.0243827  | 0.04601205 | 0.95398795 | 0.05434539 | 0.94565461 | 0.20647289   |
| signal transduction                      | GO:0007165 | 0.03036366 | 0.07671039 | 0.92328961 | 0.0869077  | 0.9130923  | 0.20647289   |
| cellular response to DNA damage stimulus | GO:0006974 | 0.05986914 | 0.04792627 | 0.95207373 | 0.04109589 | 0.95890411 | 0.29591157   |
| RNA binding                              | GO:0003723 | 0.06092297 | 0.11159163 | 0.88840837 | 0.1015046  | 0.8984954  | 0.29591157   |
| proteolysis                              | GO:0006508 | 0.07945869 | 0.02984757 | 0.97015243 | 0.02470245 | 0.97529755 | 0.32340841   |
| protein homodimerization activity        | GO:0042803 | 0.08560811 | 0.03417228 | 0.96582772 | 0.03974848 | 0.96025152 | 0.32340841   |
| DNA binding                              | GO:0003677 | 0.12357621 | 0.13590925 | 0.86409075 | 0.12688075 | 0.87311925 | 0.40618093   |
| chromosome                               | GO:0005694 | 0.13743202 | 0.04679192 | 0.95320808 | 0.04132046 | 0.95867954 | 0.40618093   |
| cytosol                                  | GO:0005829 | 0.14335798 | 0.36830911 | 0.63169089 | 0.35616438 | 0.64383562 | 0.40618093   |
| intracellular membrane-bounded organelle | GO:0043231 | 0.18261927 | 0.06196384 | 0.93803616 | 0.05636649 | 0.94363351 | 0.47761962   |
| kinase activity                          | GO:0016301 | 0.19699184 | 0.05303084 | 0.94696916 | 0.05816304 | 0.94183696 | 0.47840875   |
| endoplasmic reticulum                    | GO:0005783 | 0.25075567 | 0.07529245 | 0.92470755 | 0.07006512 | 0.92993488 | 0.56837951   |
| integral component of plasma membrane    | GO:0005887 | 0.29738482 | 0.04360156 | 0.95639844 | 0.04738379 | 0.95261621 | 0.60724712   |
| protein transport                        | GO:0015031 | 0.30362356 | 0.04870613 | 0.95129387 | 0.05254884 | 0.94745116 | 0.60724712   |
| Golgi apparatus                          | GO:0005794 | 0.38468953 | 0.08933002 | 0.91066998 | 0.09364473 | 0.90635527 | 0.69838239   |
| intracellular signal transduction        | GO:0035556 | 0.45623218 | 0.03034385 | 0.96965615 | 0.03256232 | 0.96743768 | 0.69838239   |
| cytoplasmic vesicle                      | GO:0031410 | 0.47844223 | 0.0450195  | 0.9549805  | 0.0424433  | 0.9575567  | 0.69838239   |
| nucleolus                                | GO:0005730 | 0.4785997  | 0.05083304 | 0.94916696 | 0.04805749 | 0.95194251 | 0.69838239   |
| nuclear speck                            | GO:0016607 | 0.48134902 | 0.03417228 | 0.96582772 | 0.03637997 | 0.96362003 | 0.69838239   |

|                                              |            |            |            |            |            |            |            |
|----------------------------------------------|------------|------------|------------|------------|------------|------------|------------|
| integral component of membrane               | GO:0016021 | 0.48139738 | 0.18674229 | 0.81325771 | 0.19155625 | 0.80844375 | 0.69838239 |
| metal ion binding                            | GO:0046872 | 0.4929758  | 0.22034739 | 0.77965261 | 0.21536043 | 0.78463957 | 0.69838239 |
| nucleotide binding                           | GO:0000166 | 0.56447775 | 0.1235732  | 0.8764268  | 0.12014372 | 0.87985628 | 0.74548188 |
| apoptotic process                            | GO:0006915 | 0.57100726 | 0.04005672 | 0.95994328 | 0.04199416 | 0.95800584 | 0.74548188 |
| cytoskeleton                                 | GO:0005856 | 0.60856344 | 0.0899681  | 0.9100319  | 0.08735684 | 0.91264316 | 0.74548188 |
| G protein-coupled receptor signaling pathway | GO:0007186 | 0.61671766 | 0.0248139  | 0.9751861  | 0.02335504 | 0.97664496 | 0.74548188 |
| Golgi membrane                               | GO:0000139 | 0.6358522  | 0.04119107 | 0.95880893 | 0.04289243 | 0.95710757 | 0.74548188 |
| endoplasmic reticulum membrane               | GO:0005789 | 0.66136003 | 0.0494151  | 0.9505849  | 0.04760835 | 0.95239165 | 0.74954137 |
| transmembrane transport                      | GO:0055085 | 0.69054983 | 0.02367955 | 0.97632045 | 0.02245677 | 0.97754323 | 0.7530018  |
| neutrophil degranulation                     | GO:0043312 | 0.70870758 | 0.02637363 | 0.97362637 | 0.02739726 | 0.97260274 | 0.7530018  |
| ion transport                                | GO:0006811 | 0.90611481 | 0.02183623 | 0.97816377 | 0.02133393 | 0.97866607 | 0.93357284 |
| perinuclear region of cytoplasm              | GO:0048471 | 0.96715109 | 0.04558667 | 0.95441333 | 0.04581181 | 0.95418819 | 0.96715109 |

GO, gene ontology ID; T0 indicates pretransplant, T6 is after ~6 years. All p values significant only before correction for multiple comparisons.

## References

1. Aymard, F., *et al.* Transcriptionally active chromatin recruits homologous recombination at DNA double-strand breaks. *Nat Struct Mol Biol* **21**, 366-374 (2014).
2. Luco, R.F., *et al.* Regulation of alternative splicing by histone modifications. *Science* **327**, 996-1000 (2010).
3. Skucha, A., Ebner, J. & Grebien, F. Roles of SETD2 in Leukemia-Transcription, DNA-Damage, and Beyond. *Int J Mol Sci* **20**(2019).
4. Ramdzan, Z.M. & Nepveu, A. CUX1, a haploinsufficient tumour suppressor gene overexpressed in advanced cancers. *Nat Rev Cancer* **14**, 673-682 (2014).
5. McNerney, M.E., *et al.* CUX1 is a haploinsufficient tumor suppressor gene on chromosome 7 frequently inactivated in acute myeloid leukemia. *Blood* **121**, 975-983 (2013).
6. Aly, M., *et al.* Distinct clinical and biological implications of CUX1 in myeloid neoplasms. *Blood Adv* **3**, 2164-2178 (2019).
7. Yan, J., Jia, Y., Chen, H., Chen, W. & Zhou, X. Long non-coding RNA PXN-AS1 suppresses pancreatic cancer progression by acting as a competing endogenous RNA of miR-3064 to upregulate PIP4K2B expression. *J Exp Clin Cancer Res* **38**, 390 (2019).
8. Salgia, R., *et al.* CRKL links p210BCR/ABL with paxillin in chronic myelogenous leukemia cells. *J Biol Chem* **270**, 29145-29150 (1995).
9. Kim, Y., *et al.* Mutations of the SLX4 gene in Fanconi anemia. *Nat Genet* **43**, 142-146 (2011).
10. Yamamoto, K.N., *et al.* Involvement of SLX4 in interstrand cross-link repair is regulated by the Fanconi anemia pathway. *Proc Natl Acad Sci U S A* **108**, 6492-6496 (2011).
11. Spinella, J.F., *et al.* Whole-exome sequencing of a rare case of familial childhood acute lymphoblastic leukemia reveals putative predisposing mutations in Fanconi anemia genes. *BMC Cancer* **15**, 539 (2015).
12. Arias-Salgado, E.G., *et al.* Genetic analyses of aplastic anemia and idiopathic pulmonary fibrosis patients with short telomeres, possible implication of DNA-repair genes. *Orphanet J Rare Dis* **14**, 82 (2019).
13. Brodeur, G.M. The NF1 gene in myelopoiesis and childhood myelodysplastic syndromes. *N Engl J Med* **330**, 637-639 (1994).
14. Chan, R.J., Cooper, T., Kratz, C.P., Weiss, B. & Loh, M.L. Juvenile myelomonocytic leukemia: a report from the 2nd International JMML Symposium. *Leuk Res* **33**, 355-362 (2009).
15. Fane, M., Harris, L., Smith, A.G. & Piper, M. Nuclear factor one transcription factors as epigenetic regulators in cancer. *Int J Cancer* **140**, 2634-2641 (2017).
16. Alanazi, B., *et al.* Integrated nuclear proteomics and transcriptomics identifies S100A4 as a therapeutic target in acute myeloid leukemia. *Leukemia* **34**, 427-440 (2020).



17. Li, H., *et al.* Mutations in linker histone genes HIST1H1 B, C, D, and E; OCT2 (POU2F2); IRF8; and ARID1A underlying the pathogenesis of follicular lymphoma. *Blood* **123**, 1487-1498 (2014).
18. Hoefnagel, J.J., *et al.* Expression of B-cell transcription factors in primary cutaneous B-cell lymphoma. *Mod Pathol* **19**, 1270-1276 (2006).
19. Murati, A., *et al.* PCM1-JAK2 fusion in myeloproliferative disorders and acute erythroid leukemia with t(8;9) translocation. *Leukemia* **19**, 1692-1696 (2005).
20. Reiter, A., *et al.* The t(8;9)(p22;p24) is a recurrent abnormality in chronic and acute leukemia that fuses PCM1 to JAK2. *Cancer Res* **65**, 2662-2667 (2005).
21. Opatz, S., *et al.* The clinical mutanome of core binding factor leukemia. *Leukemia* **34**, 1553-1562 (2020).
22. Peedicayil, A., *et al.* Risk of ovarian cancer and inherited variants in relapse-associated genes. *PLoS One* **5**, e8884 (2010).
23. Zhang, S., Deen, S., Storr, S.J., Yao, A. & Martin, S.G. Expression of Syk and MAP4 proteins in ovarian cancer. *J Cancer Res Clin Oncol* **145**, 909-919 (2019).
24. Murga Penas, E.M., *et al.* A novel fusion of the MALT1 gene and the microtubule-associated protein 4 (MAP4) gene occurs in diffuse large B-cell lymphoma. *Genes Chromosomes Cancer* **45**, 863-873 (2006).
25. De Felice, D. & Alaimo, A. Mechanosensitive Piezo Channels in Cancer: Focus on altered Calcium Signaling in Cancer Cells and in Tumor Progression. *Cancers (Basel)* **12**(2020).
26. Han, Y., *et al.* Mechanosensitive ion channel Piezo1 promotes prostate cancer development through the activation of the Akt/mTOR pathway and acceleration of cell cycle. *Int J Oncol* **55**, 629-644 (2019).
27. Sossey-Alaoui, K., Kitamura, E., Head, K. & Cowell, J.K. Characterization of FAM10A4, a member of the ST13 tumor suppressor gene family that maps to the 13q14.3 region associated with B-Cell leukemia, multiple myeloma, and prostate cancer. *Genomics* **80**, 5-7 (2002).
28. Esgueva, R., *et al.* Prevalence of TMPRSS2-ERG and SLC45A3-ERG gene fusions in a large prostatectomy cohort. *Mod Pathol* **23**, 539-546 (2010).
29. Palanisamy, N., *et al.* Rearrangements of the RAF kinase pathway in prostate cancer, gastric cancer and melanoma. *Nat Med* **16**, 793-798 (2010).
30. Urso, K., *et al.* NFATc3 controls tumour growth by regulating proliferation and migration of human astrogloma cells. *Sci Rep* **9**, 9361 (2019).
31. Glud, S.Z., *et al.* A tumor-suppressor function for NFATc3 in T-cell lymphomagenesis by murine leukemia virus. *Blood* **106**, 3546-3552 (2005).
32. Cho, Y., *et al.* Intramembrane proteolysis of an extracellular serine protease, epithin/PRSS14, enables its intracellular nuclear function. *BMC Biol* **18**, 60 (2020).

33. Zanini, S., *et al.* GNA15 expression in small intestinal neuroendocrine neoplasia: functional and signalling pathway analyses. *Cell Signal* **27**, 899-907 (2015).
34. Nakase, K., *et al.* Overexpression of novel short isoforms of Helios in a patient with T-cell acute lymphoblastic leukemia. *Exp Hematol* **30**, 313-317 (2002).
35. Chan, S.M. The Making of a Leukemic Stem Cell: A Novel Role for IKZF2 in AML Stemness and Differentiation. *Cell Stem Cell* **24**, 5-6 (2019).
36. Revert, F., *et al.* Selective targeting of collagen IV in the cancer cell microenvironment reduces tumor burden. *Oncotarget* **9**, 11020-11045 (2018).
37. Montalbano, J., Jin, W., Sheikh, M.S. & Huang, Y. RBEL1 is a novel gene that encodes a nucleocytoplasmic Ras superfamily GTP-binding protein and is overexpressed in breast cancer. *J Biol Chem* **282**, 37640-37649 (2007).
38. Tang, H., *et al.* RBEL1 is required for osteosarcoma cell proliferation via inhibiting retinoblastoma 1. *Mol Med Rep* **13**, 1275-1280 (2016).
39. Hagen, J., *et al.* RABL6A promotes G1-S phase progression and pancreatic neuroendocrine tumor cell proliferation in an Rb1-dependent manner. *Cancer Res* **74**, 6661-6670 (2014).
40. Wang, L. & Shilatifard, A. UTX Mutations in Human Cancer. *Cancer Cell* **35**, 168-176 (2019).
41. Schulz, W.A., Lang, A., Koch, J. & Greife, A. The histone demethylase UTX/KDM6A in cancer: Progress and puzzles. *Int J Cancer* **145**, 614-620 (2019).
42. Van der Meulen, J., *et al.* The H3K27me3 demethylase UTX is a gender-specific tumor suppressor in T-cell acute lymphoblastic leukemia. *Blood* **125**, 13-21 (2015).
43. van Haften, G., *et al.* Somatic mutations of the histone H3K27 demethylase gene UTX in human cancer. *Nat Genet* **41**, 521-523 (2009).
44. An, J.Y., *et al.* UBR2 of the N-end rule pathway is required for chromosome stability via histone ubiquitylation in spermatocytes and somatic cells. *PLoS One* **7**, e37414 (2012).
45. Kume, K., *et al.* Role of N-end rule ubiquitin ligases UBR1 and UBR2 in regulating the leucine-mTOR signaling pathway. *Genes Cells* **15**, 339-349 (2010).
46. Kwon, Y.T., *et al.* Female lethality and apoptosis of spermatocytes in mice lacking the UBR2 ubiquitin ligase of the N-end rule pathway. *Mol Cell Biol* **23**, 8255-8271 (2003).
47. Tasaki, T., Sriram, S.M., Park, K.S. & Kwon, Y.T. The N-end rule pathway. *Annu Rev Biochem* **81**, 261-289 (2012).
48. Villa, E., *et al.* The E3 ligase UBR2 regulates cell death under caspase deficiency via Erk/MAPK pathway. *Cell Death Dis* **11**, 1041 (2020).
49. Zhang, G., Lin, R.K., Kwon, Y.T. & Li, Y.P. Signaling mechanism of tumor cell-induced up-regulation of E3 ubiquitin ligase UBR2. *FASEB J* **27**, 2893-2901 (2013).

50. Cavazzana-Calvo, M., *et al.* Transfusion independence and HMGA2 activation after gene therapy of human beta-thalassaemia. *Nature* **467**, 318-322 (2010).
51. Thompson, A.A., *et al.* Gene Therapy in Patients with Transfusion-Dependent beta-Thalassemia. *N Engl J Med* **378**, 1479-1493 (2018).
52. Schneiderman, J., *et al.* Interim Results from the Phase 3 Hgb-207 (Northstar-2) and Hgb-212 (Northstar-3) Studies of Betibeglogene Autotemcel Gene Therapy (LentiGlobin) for the Treatment of Transfusion-Dependent  $\beta$ -Thalassemia. *Biology of Blood and Marrow Transplantation* **26**, S87-S88 (2020).
53. Frangoul, H., *et al.* Safety and Efficacy of CTX001 in Patients with Transfusion-Dependent  $\beta$ -Thalassemia and Sickle Cell Disease: Early Results from the Climb THAL-111 and Climb SCD-121 Studies of Autologous CRISPR-CAS9-Modified CD34+ Hematopoietic Stem and Progenitor Cells. *Blood* **136**, 3-4 (2020).
54. Frangoul, H., *et al.* CRISPR-Cas9 Gene Editing for Sickle Cell Disease and beta-Thalassemia. *N Engl J Med* **384**, 252-260 (2021).
55. Markt, S., *et al.* Intrabone hematopoietic stem cell gene therapy for adult and pediatric patients affected by transfusion-dependent  $\alpha$ -thalassemia. *Nat Med* **25**, 234-241 (2019).
